# Supplementary material for: Identification of care tasks for the use of wearable transfer support robots – an observational study at nursing facilities using robots on a daily basis
Source: PubMed Central journal article supplement (PMC8256590; doi:10.1186/s12913-021-06639-2), 2021-07-05
Supplement: 12913_2021_6639_MOESM1_ESM.pdf [file 12913_2021_6639_MOESM1_ESM.pdf]

Supplementary information for

**Identification of care tasks for the use of wearable transfer support robots – an observational study at nursing facilities using robots on a daily basis**

**Authors:**

Kenji Kato\*<sup>1</sup>, Tatsuya Yoshimi<sup>1</sup>, Shohei Tsuchimoto<sup>1</sup>, Nobuaki Mizuguchi<sup>1</sup>, Keita Aimoto<sup>2</sup>, Naoki Itoh<sup>2</sup>, Izumi Kondo<sup>2,3</sup>.

**Affiliations:**

1, Laboratory for Clinical Evaluation with Robotics, Center of Assistive Robotics and Rehabilitation for Longevity and Good Health, National Center for Geriatrics and Gerontology

2, Department of Rehabilitation Medicine, National Center for Geriatrics and Gerontology

3, Center of Assistive Robotics and Rehabilitation for Longevity and Good Health, National Center for Geriatrics and Gerontology

7-430, Morioka, Obu, Aichi 474-8511, JAPAN, Tel. +81-562-46-2311

(\*to whom correspondently addressed, e-mail: [kk0724@ncgg.go.jp](mailto:kk0724@ncgg.go.jp))

Supplementary Table 1. Code chart

| Major category                                              | Middle category                              | Code: subcategory                                                                    | Classification                  | Major category                                           | Middle category                                                                       | Code: subcategory                                                                     | Classification                                                |                                                 |                                                   |                                     |
|-------------------------------------------------------------|----------------------------------------------|--------------------------------------------------------------------------------------|---------------------------------|----------------------------------------------------------|---------------------------------------------------------------------------------------|---------------------------------------------------------------------------------------|---------------------------------------------------------------|-------------------------------------------------|---------------------------------------------------|-------------------------------------|
| 1 Bathing / keeping clean / conditioning / changing clothes | 1 Bathing                                    | 111 Bathing preparation                                                              | Direct care                     | 6 Social life support                                    | 1 Events, club activities                                                             | 610 Events, club activities                                                           | Communication                                                 |                                                 |                                                   |                                     |
|                                                             |                                              | 112 Bathing: verbal action, assistance, watching, etc.                               |                                 |                                                          |                                                                                       | 2 Telephone, FAX, E-mail, letter                                                      |                                                               | 620 Telephone, FAX, E-mail, Letter              |                                                   |                                     |
|                                                             |                                              | 113 Bathing cleanup                                                                  |                                 |                                                          |                                                                                       | 3 Document creation                                                                   |                                                               | 630 Document creation                           |                                                   |                                     |
|                                                             | 2 Wiping and cleansing                       | 120 Wiping and cleansing                                                             |                                 |                                                          | 4 Responding to visitors                                                              | 640 Responding to visitors                                                            |                                                               |                                                 |                                                   |                                     |
|                                                             |                                              | 130 Hair washing                                                                     |                                 |                                                          |                                                                                       | 5 Movement when going out                                                             |                                                               | 650 Moving when going out                       |                                                   |                                     |
|                                                             |                                              | 140 Washbasin / hand washing                                                         |                                 |                                                          |                                                                                       | 6 Acts on the go                                                                      |                                                               | 660 Acts on the go                              |                                                   |                                     |
|                                                             | 150 Oral and ear care                        | 160 Dealing with menstruation                                                        |                                 |                                                          | 170 Conditioning                                                                      | 180 Changing clothes                                                                  |                                                               | 190 Others                                      | 7 Relationship with the community                 | 670 Relationship with the community |
|                                                             | 200 Dealing with menstruation                | 210 Conditioning                                                                     |                                 |                                                          | 220 Changing clothes                                                                  | 230 Others                                                                            |                                                               | 8 Professional training / production activities | 680 Professional training / production activities |                                     |
|                                                             | 240 Social life training                     | 250 Social life training                                                             |                                 |                                                          | 260 Other                                                                             | 270 Other                                                                             |                                                               | 9 Social life training                          | 690 Social life training                          |                                     |
| 280 Other                                                   | 290 Other                                    | 300 Other                                                                            | 310 Other                       | 0 Other                                                  | 700 Other                                                                             |                                                                                       |                                                               |                                                 |                                                   |                                     |
| 2 Moving / transfers / changing position                    | 1 Movement within the facility               | 211 Preparation for movement within the facility                                     | Direct care                     | 7 Behavioral problems                                    | 710 Response when behavioral problems occur                                           |                                                                                       | Others                                                        |                                                 |                                                   |                                     |
|                                                             |                                              | 212 Movement within the facility: verbal action, assistance, watching, etc.          |                                 |                                                          | 720 Preventive response to behavioral problems                                        |                                                                                       |                                                               |                                                 |                                                   |                                     |
|                                                             |                                              | 213 Movement within the facility                                                     |                                 |                                                          | 730 Preventive training for behavioral problems                                       |                                                                                       |                                                               |                                                 |                                                   |                                     |
|                                                             | 2 Transfers                                  | 221 Transfer preparation                                                             |                                 | 8 Medical                                                | 1 Use of drugs                                                                        | 810 Use of drugs                                                                      |                                                               | Medical care                                    |                                                   |                                     |
|                                                             |                                              | 222 Transfers: verbal action, assistance, watching, etc.                             |                                 |                                                          |                                                                                       | 820 Respiratory, circulatory, digestive, and urinary procedures                       |                                                               |                                                 |                                                   |                                     |
|                                                             |                                              | 223 Transfer cleanup                                                                 |                                 |                                                          |                                                                                       | 830 Exercise equipment / skin / eye / otolaryngology / dental and surgical procedures |                                                               |                                                 |                                                   |                                     |
|                                                             | 3 Getting up                                 | 231 Preparation for getting up                                                       |                                 | 4 Observation / measurement / inspection                 | 840 Observation / measurement / inspection                                            |                                                                                       |                                                               |                                                 |                                                   |                                     |
|                                                             |                                              | 232 Getting up: verbal action, assistance, watching, etc.                            |                                 |                                                          | 5 Guidance / advice                                                                   | 850 Guidance / advice                                                                 |                                                               |                                                 |                                                   |                                     |
|                                                             |                                              | 233 Getting up: cleaning up                                                          |                                 |                                                          |                                                                                       | 6 Assistance when visiting a medical institution                                      | 860 Assistance when visiting a medical institution            |                                                 |                                                   |                                     |
|                                                             | 4 Standing up                                | 241 Preparation for standing up                                                      |                                 | 9 Others                                                 |                                                                                       |                                                                                       | 890 Others                                                    |                                                 |                                                   |                                     |
|                                                             |                                              | 242 Standing up, verbal action, assistance, watching, etc.                           |                                 |                                                          | 9 Physical function training                                                          |                                                                                       | 1 General                                                     | 910 General                                     |                                                   |                                     |
|                                                             |                                              | 243 Standing up: cleaning up                                                         |                                 |                                                          |                                                                                       | 2 Applied daily life training                                                         |                                                               | 920 Applied daily life training                 |                                                   |                                     |
|                                                             | 5 Other postural changes                     | 251 Preparation for other posture changes                                            |                                 | 930 Speech / hearing training (speech / hearing therapy) |                                                                                       |                                                                                       |                                                               | 4 Sports training                               | 940 Sports training                               |                                     |
|                                                             |                                              | 252 Other postural changes: verbal action, assistance, watching, etc.                |                                 |                                                          | 5 Traction / heat / electrotherapy                                                    |                                                                                       | 950 Traction / heat / electrotherapy                          |                                                 |                                                   |                                     |
|                                                             |                                              | 253 Other postural changes: cleaning up                                              |                                 |                                                          |                                                                                       | 9 Others                                                                              | 990 Others                                                    |                                                 |                                                   |                                     |
|                                                             | 6 Putting on and taking off assistance tools | 261 Preparation for attaching / detaching assistance tools                           |                                 | 0 Care that is not directly related to the recipient     |                                                                                       |                                                                                       | How about to use service like "1 Service about the recipient" |                                                 | 011 Contact / coordination                        | Indirect care                       |
|                                                             |                                              | 262 Attaching/ detaching assistance tools: verbal action, assistance, watching, etc. |                                 |                                                          | 012 Recording / document creation                                                     |                                                                                       | Documentation                                                 |                                                 |                                                   |                                     |
|                                                             |                                              | 263 Attaching/ detaching assistance tools: cleaning up                               |                                 |                                                          | 013 Residents' units, floors, etc., environment maintenance and cleaning              | Indirect care                                                                         |                                                               |                                                 |                                                   |                                     |
| 9 Others                                                    | 290 Others                                   | 014 Resident goods management (including goods purchasing)                           | Transit                         |                                                          |                                                                                       |                                                                                       |                                                               |                                                 |                                                   |                                     |
|                                                             | 3 Meal assistance                            | 310 Cooking                                                                          |                                 | 2 Service about staff                                    | 021 Hand washing                                                                      | Indirect care                                                                         |                                                               |                                                 |                                                   |                                     |
|                                                             |                                              |                                                                                      | 2 Serving / lower serving       |                                                          | 320 Serving / lower serving                                                           | 022 Waiting (napping)                                                                 | Staff Break                                                   |                                                 |                                                   |                                     |
| 3 Dishwashing and cleaning up dishes                        |                                              |                                                                                      |                                 |                                                          | 330 Dishwashing and cleaning up dishes                                                | 023 Records and coordination regarding staff                                          | Documentation                                                 |                                                 |                                                   |                                     |
|                                                             | 4 Eating (meals / snacks)                    | 340 Eating (meals / snacks)                                                          |                                 | 5 Hydration                                              | 350 Hydration                                                                         | 024 Break                                                                             | Staff Break                                                   |                                                 |                                                   |                                     |
|                                                             |                                              |                                                                                      | 9 Others                        |                                                          | 390 Other                                                                             | 025 Environmental maintenance and cleaning for staff                                  | Indirect care                                                 |                                                 |                                                   |                                     |
| 4 Toileting                                                 |                                              |                                                                                      |                                 |                                                          | 411 Preparation for urination                                                         | 1 Urination                                                                           | 412 Urination: verbal action, assistance, watching, etc.      | 026 Moving                                      | Transit                                           |                                     |
|                                                             | 413 Urination cleanup                        | 027 Maintenance of installed equipment                                               |                                 | Equipment                                                |                                                                                       |                                                                                       |                                                               |                                                 |                                                   |                                     |
|                                                             | 2 Defecation                                 | 421 Defecation preparation                                                           | 028 About staff (other)         | Indirect care                                            |                                                                                       |                                                                                       |                                                               |                                                 |                                                   |                                     |
| 422 Defecation: verbal action, assistance, watching, etc.   |                                              | 423 Defecation cleanup                                                               | 099 Others                      | Others                                                   |                                                                                       |                                                                                       |                                                               |                                                 |                                                   |                                     |
| 490 Others                                                  |                                              | 10 Correspond with other units                                                       | 999 Correspond with other units | Others                                                   |                                                                                       |                                                                                       |                                                               |                                                 |                                                   |                                     |
| 5 Life support for independence                             | 1 Laundry                                    | 510 Laundry                                                                          | Indirect care                   | Code chart                                               | 1 Bathing / keeping clean / conditioning / changing clothes                           | Direct care                                                                           |                                                               |                                                 |                                                   |                                     |
|                                                             |                                              | 2 Cleaning and garbage disposal                                                      |                                 |                                                          |                                                                                       |                                                                                       | 520 Cleaning and garbage disposal                             | 2 Moving / transfers / changing position        |                                                   |                                     |
|                                                             |                                              |                                                                                      |                                 |                                                          |                                                                                       |                                                                                       | 3 Organizing                                                  |                                                 | 530 Organizing                                    | 3 Meal assistance                   |
|                                                             | 4 Food management                            |                                                                                      |                                 |                                                          | 540 Food management                                                                   | 4 Toileting                                                                           |                                                               |                                                 |                                                   |                                     |
|                                                             |                                              | 5 Money management                                                                   |                                 |                                                          | 550 Money management                                                                  |                                                                                       |                                                               | 5 Life support for independence                 | Indirect care/ Communication                      |                                     |
|                                                             |                                              |                                                                                      |                                 |                                                          | 6 Door locking, fire extinguishing, disaster prevention                               |                                                                                       | 560 Door locking, fire extinguishing, disaster prevention     |                                                 | 6 Social life support                             | Communication                       |
|                                                             | 7 Awakening and sleeping                     |                                                                                      |                                 |                                                          |                                                                                       | 570 Awakening sleeping                                                                | 7 Behavioral problems                                         |                                                 |                                                   | Others                              |
|                                                             |                                              | 8 Other daily life                                                                   |                                 |                                                          |                                                                                       | 580 Other daily life                                                                  |                                                               | 8 Medical                                       |                                                   | Medical care                        |
|                                                             |                                              |                                                                                      |                                 |                                                          | 590 Conversation including consultation, advice and guidance, and other communication | 500 Others                                                                            |                                                               |                                                 | 9 Physical function training                      |                                     |
|                                                             | 0 Others                                     |                                                                                      |                                 |                                                          |                                                                                       |                                                                                       | 500 Others                                                    |                                                 |                                                   |                                     |
| 10 Correspond with other units                              |                                              | 999 Correspond with other units                                                      | 10 Correspond with other units  | Others                                                   |                                                                                       |                                                                                       |                                                               |                                                 |                                                   |                                     |
